# Supplementary material
Source: publisher site journal article supplement (https://www.dovepress.com/article/401357)
Supplement: Supplementary file 1 [file get_supplementary_file.php]

**Supplementary file**

**Supplementary Table 1** Correlation of clinical parameters with variability of baseline eosinophil count

| **Clinical parameters** | **Pearson correlation coefficient** | **p-value** |
| --- | --- | --- |
| mMRC score | 0.016 | 0.789 |
| CAT score | -0.036 | 0.562 |
| FEV1 (L) | -0.022 | 0.713 |
| FEV1 (% predicted) | -0.038 | 0.533 |
| FEV1/FVC Ratio (%) | 0.016 | 0.789 |
| Bronchodilator responsiveness (mL) | -0.073 | 0.272 |
| Bronchodilator responsiveness (%) | -0.007 | 0.920 |
| FEV1/FVC Ratio (%) | -0.071 | 0.241 |
| Baseline blood eosinophil count (x cells/µL) | 0.104 | 0.087 |
| Baseline blood eosinophil percentage | 0.081 | 0.180 |

**Supplementary Table 2** Baseline blood baseline eosinophil count among patients in different COPD Group as in GOLD recommendation

| **COPD Group as in GOLD recommendation** | **Median baseline eosinophil count (cells/µL), [IQR]** |
| --- | --- |
| A | 200 [120 – 320] |
| B | 180 [100 – 298] |
| C | 190 [120 – 280] |
| D | 180 [65 – 240] |

**Supplementary Table 3** Baseline blood baseline eosinophil count among patients in different COPD Stage by spirometry results

| **COPD Stage by spirometry results** | **Median baseline eosinophil count (cells/µL), [IQR]** |
| --- | --- |
| A | 200 [120 – 335] |
| B | 170 [90 – 260] |
| C | 200 [125 – 335] |
| D | 160 [80 – 220] |

**Supplementary Table 4** Cut-off of variability of baseline eosinophil count identified by Receiver Operating Curve (ROC) and the sensitivity and specificity

| **Cut-off** | **Sensitivity** | **Specificity** |
| --- | --- | --- |
| 40 | 84.7% | 75.0% |
| 45 | 84.7% | 76.2% |
| 50 | 82.9% | 79.3% |
| 55 | 80.2% | 81.1% |
| 60 | 75.7% | 82.9% |
| 65 | 75.7% | 83.5% |

**Supplementary Table 5** Cut-off of variability of baseline eosinophil count identified by Receiver Operating Curve (ROC) and the sensitivity and specificity in the subgroup with baseline eosinophil count below 300 cells/µL

| **Cut-off** | **Sensitivity** | **Specificity** |
| --- | --- | --- |
| 30 | 85.5% | 76.2% |
| 40 | 84.2% | 78.7% |
| 45 | 82.9% | 83.6% |
| 50 | 80.3% | 86.1% |
| 55 | 76.3% | 87.7% |
| 60 | 76.3% | 87.7% |
